CORRECTION

# Correction: Pleiotropic Functions for Transcription Factor Zscan10

The *PLOS ONE* Staff

There are errors in the Competing Interests section. The correct competing interests information is as follows: This study was supported in part by the Agency for Science Technology and Research (A\*STAR) Singapore. This does not alter our adherence to PLOS ONE policies on sharing data and materials.

## Reference

1. Kraus P, V S, Yu HB, Xing X, Lim SL, Adler T, et al. (2014) Pleiotropic Functions for Transcription Factor Zscan10. PLoS ONE 9(8): e104568. doi: [10.1371/journal.pone.0104568](https://doi.org/10.1371/journal.pone.0104568) PMID: [25111779](https://pubmed.ncbi.nlm.nih.gov/25111779/)

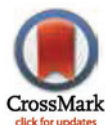

## OPEN ACCESS

**Citation:** The *PLOS ONE* Staff (2015) Correction: Pleiotropic Functions for Transcription Factor Zscan10. PLoS ONE 10(3): e0118766. doi:10.1371/journal.pone.0118766

**Published:** March 5, 2015

**Copyright:** © 2015 The PLOS ONE Staff. This is an open access article distributed under the terms of the [Creative Commons Attribution License](https://creativecommons.org/licenses/by/4.0/), which permits unrestricted use, distribution, and reproduction in any medium, provided the original author and source are credited.
